# Supplementary material for: Liquid Metal Fibers with a Knitted Structure for Wearable Electronics
Source: MDPI journal article supplement (doi:10.3390/bios13070715), 2023-07-07
Supplement: s1 [file s1]

## Supporting Information

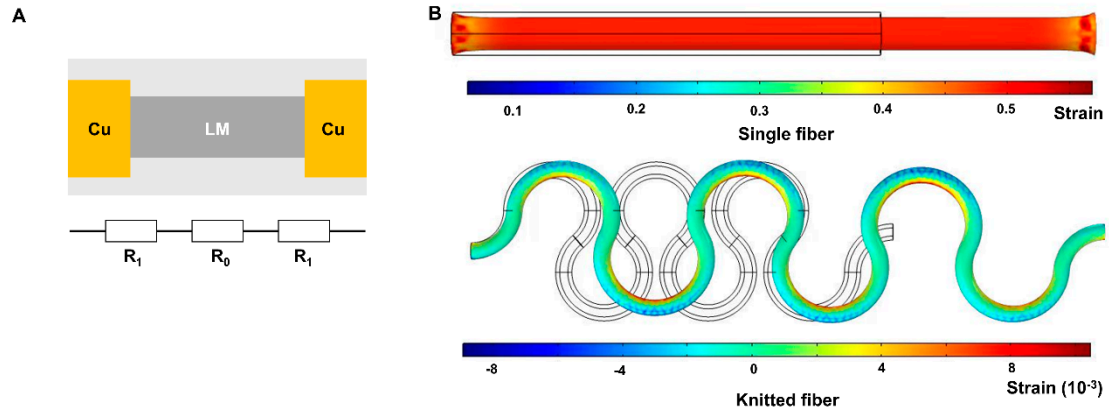

**Figure S1.** (A) Theoretical electrical model and (B) simulation results for two fibers.

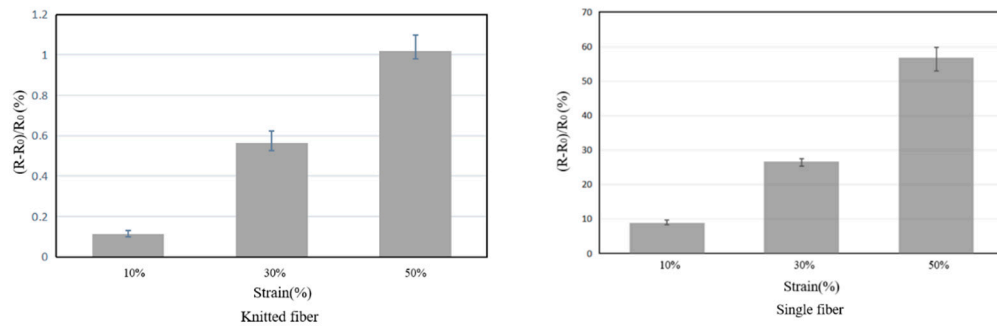

**Figure S2** The error bars of the resistance rate for both the knitted liquid metal fibers and a single liquid metal fiber.

**Table S1** The theoretical resistance values

|               | Strain | Area ( $A$ ) | Length ( $L$ ) | $R_0$      | $R_1$       |
|---------------|--------|--------------|----------------|------------|-------------|
| Single fiber  | 50%    | $0.66 A_0$   | $1.5 L_0$      | $2.25 R_0$ | $0.68 R_0$  |
| Knitted fiber | 50%    | $0.99 A_0$   | $1.01 L_0$     | $1.02 R_0$ | $0.485 R_0$ |

**Table S2** Summary of performances of several studies on liquid metal fibers

| Reference | Method and Materials                                                                 | Max.stret<br>chability | Resistance<br>variation rate | Conductivity<br>(S/m) |
|-----------|--------------------------------------------------------------------------------------|------------------------|------------------------------|-----------------------|
| [17]      | liquid metal mixed with Cu particles (Cu-EGaIn)                                      | 75%                    | 37% at 20% strain            | $6 \times 10^6$       |
| [18]      | embed the patterned LMPs on the surface of polymers by casting and peeling off steps | 500%                   | <3% with a strain of 50%     | $8 \times 10^5$       |
| [26]      | natural and synthetic fiber cores, and Cu-Ga-In coating                              | 300%                   | 5% at 100% strain            | $3.4 \times 10^6$     |
| [15]      | Microchannel injection                                                               | 800%                   | > 10000%                     | $3.4 \times 10^6$     |
| This      | Knitted Structure based on                                                           | 50%                    | <1%                          | $3.4 \times 10^6$     |

research    microchannel injection  
work

---
